# Supplementary material
Source: MDPI journal article supplement (https://www.mdpi.com/2076-3417/11/10/4583)
Supplement: s1 [file s1]

# ***Arcopilus aureus* MaC7A as a new source of resveratrol: assessment of amino acid precursors, volatiles and fungal enzymes for boosting resveratrol production in batch cultures**

GAGTTGCAAACTCCCTAAACCATTGTGGACGCTACCTTTTAACGTTGCTTCGGCGGGCGGCCCGCTCCC  
CTGGAAAGCCCCTGTGGCCGCCCGGGGCTGCGAGCCCCCGGCCCCCTCGCGGGGGCGCCCGCCGAGG  
ATACCCAACCTCTTGATTATTTTAGGCCTCTCTGAGTCTTCTGTACTGAATAAGTCAAACTTTCAACAAC  
GGATCTCTTGGTTCTGGCATCGATGAAGAACGCAGCGAAATGCGATAAGTAATGTGAATTGCAGAATTCA  
GTGAATCATCGAATCTTTGAACGCACATTGCGCCCGCCAGTATTCTGGCGGGCATGCCTGTTTCGAGCGTC  
ATTTCAACCATCAAGCCCCAGGCTTGTGTTGGGGACCTGCGGCTGCCGCAGGCCCTGAAATCCAGTGGCG  
GGTTCGCTGTCACCCCGAGCGTAGTAGCAATATCTCGCTCAGGGCGTGCTGCGGGCGCCGGCCGTTAAAA  
GCTGCCTTCTGGCAACACCCAAGGTTGACCTCGGATCAGGTAGGAAGACCCGCTGAACTTAAGCAT

**Supplementary sequence S1.** Partial ITS region for *A. aureus* MaC7A previously deposited at nucleotide databank of National Center for Biotechnology Information (MW318995.1).
